# Supplementary material for: Higher Nutritional Adequacy Is Associated With Lower All-Cause Mortality: Findings From the J-MICC Cohort Study
Source: Research Square preprint supplement (doi:10.21203/rs.3.rs-6714065/v1), 2025-06-30
Supplement: Supplementary file 1 [file 6cbc7742939a132c55cc4459.pdf]

**Supplementary Table 1 Daily reference values and recommended intake values for individual nutrients used in the nutritional adequacy score calculation**

|               | Unit | Sex   | Daily reference value |             |           |
|---------------|------|-------|-----------------------|-------------|-----------|
|               |      |       | 30–49 years           | 50–64 years | ≥65 years |
| Energy        | kcal | Men   | 2700                  | 2600        | 2400      |
|               |      | Women | 2050                  | 1950        | 1850      |
| Protein       | g    | Men   | 65                    | 65          | 60        |
|               |      | Women | 50                    | 50          | 50        |
| Fiber         | g    | Men   | ≥21                   | ≥21         | ≥20       |
|               |      | Women | ≥18                   | ≥18         | ≥17       |
| Vitamin A     | μg   | Men   | 900                   | 900         | 850       |
|               |      | Women | 700                   | 700         | 700       |
| Vitamin C     | mg   | Men   | 100                   | 100         | 100       |
|               |      | Women | 100                   | 100         | 100       |
| Vitamin E     | mg   | Men   | 6.0                   | 7.0         | 7.0       |
|               |      | Women | 5.5                   | 6           | 6.5       |
| Calcium       | mg   | Men   | 750                   | 750         | 750       |
|               |      | Women | 650                   | 650         | 650       |
| Iron          | mg   | Men   | 7.5                   | 7.5         | 7.5       |
|               |      | Women | 10.5                  | 11.0        | 6.0       |
| Potassium     | mg   | Men   | ≥3000                 | ≥3000       | ≥3000     |
|               |      | Women | ≥2600                 | ≥2600       | ≥2600     |
| Sodium        | mg   | Men   | ≤3000                 | ≤3000       | ≤3000     |
|               |      | Women | ≤2600                 | ≤2600       | ≤2600     |
| Saturated fat | g    | Men   | <21.0                 | <20.2       | <18.7     |
|               |      | Women | <15.9                 | <15.2       | <14.4     |

**Supplementary Table 2 Association between nutritional adequacy score and all-cause, cancer, and cardiovascular disease mortality after excluding early deaths (within 3 years from baseline) among Japanese adults: The J-MICC Study (n=27,052 men and 37,690 women)**

|                        | Nutritional adequacy score quartile |                   |                   |                   |                   |         |
|------------------------|-------------------------------------|-------------------|-------------------|-------------------|-------------------|---------|
|                        | Q1                                  | Q2                | Q3                | Q4                | Q5                | p-trend |
| Men                    |                                     |                   |                   |                   |                   |         |
| All-cause mortality    |                                     |                   |                   |                   |                   |         |
| Model 1 <sup>a</sup>   | 1.00 (ref)                          | 0.92 (0.78, 1.1)  | 0.77 (0.64, 0.92) | 0.72 (0.6, 0.87)  | 0.67 (0.56, 0.81) | <0.001  |
| Model 2 <sup>b</sup>   | 1.00 (ref)                          | 0.93 (0.78, 1.1)  | 0.77 (0.64, 0.92) | 0.72 (0.6, 0.87)  | 0.68 (0.56, 0.81) | <0.001  |
| Cancer                 |                                     |                   |                   |                   |                   |         |
| Model 1 <sup>a</sup>   | 1.00 (ref)                          | 0.94 (0.74, 1.18) | 0.79 (0.62, 1.01) | 0.74 (0.58, 0.95) | 0.67 (0.52, 0.85) | <0.001  |
| Model 2 <sup>b</sup>   | 1.00 (ref)                          | 0.96 (0.75, 1.22) | 0.82 (0.64, 1.05) | 0.77 (0.60, 1.00) | 0.70 (0.55, 0.90) | <0.001  |
| Cardiovascular disease |                                     |                   |                   |                   |                   |         |
| Model 1 <sup>a</sup>   | 1.00 (ref)                          | 0.92 (0.59, 1.43) | 0.80 (0.51, 1.26) | 0.84 (0.54, 1.31) | 0.61 (0.38, 0.97) | 0.046   |
| Model 2 <sup>b</sup>   | 1.00 (ref)                          | 0.95 (0.61, 1.48) | 0.81 (0.51, 1.30) | 0.86 (0.54, 1.36) | 0.60 (0.37, 0.98) | 0.06    |
| Women                  |                                     |                   |                   |                   |                   |         |
| All-cause mortality    |                                     |                   |                   |                   |                   |         |
| Model 1 <sup>a</sup>   | 1.00 (ref)                          | 0.97 (0.76, 1.23) | 0.91 (0.71, 1.16) | 0.76 (0.60, 0.98) | 0.89 (0.70, 1.12) | 0.86    |
| Model 2 <sup>b</sup>   | 1.00 (ref)                          | 1.00 (0.78, 1.27) | 0.95 (0.74, 1.22) | 0.79 (0.61, 1.01) | 0.92 (0.73, 1.17) | 0.99    |
| Cancer                 |                                     |                   |                   |                   |                   |         |
| Model 1 <sup>a</sup>   | 1.00 (ref)                          | 0.99 (0.71, 1.39) | 0.97 (0.69, 1.36) | 0.93 (0.67, 1.30) | 0.89 (0.64, 1.24) | 0.51    |
| Model 2 <sup>b</sup>   | 1.00 (ref)                          | 1.01 (0.72, 1.42) | 1.00 (0.71, 1.40) | 0.95 (0.68, 1.33) | 0.91 (0.65, 1.27) | 0.53    |
| Cardiovascular disease |                                     |                   |                   |                   |                   |         |
| Model 1 <sup>a</sup>   | 1.00 (ref)                          | 1.11 (0.61, 2.01) | 0.95 (0.52, 1.75) | 0.72 (0.38, 1.35) | 0.96 (0.54, 1.71) | 0.88    |
| Model 2 <sup>b</sup>   | 1.00 (ref)                          | 1.13 (0.62, 2.06) | 1.02 (0.55, 1.87) | 0.73 (0.39, 1.39) | 1.04 (0.58, 1.87) | 0.71    |

The Cox proportional hazards model was used, and values were expressed as the hazard ratios (95% CI) in Models 1–2.

a Model 1 was adjusted for age, sex, and data collection site.

b In addition to the variables in Model 1, Model 2 was adjusted for BMI, smoking status, physical activity, alcohol consumption status, stroke, hypertension, diabetes, dyslipidemia, educational attainment, vitamin supplement intake, and total energy intake

**Supplementary Table 3 Association between nutritional adequacy score and all-cause, cancer, and cardiovascular disease mortality after excluding participants with baseline disease among Japanese adults: The J-MICC Study (n=17,101 men and 26,990 women)**

|                        | Nutritional adequacy score quartile |                   |                   |                   |                   |         |
|------------------------|-------------------------------------|-------------------|-------------------|-------------------|-------------------|---------|
|                        | Q1                                  | Q2                | Q3                | Q4                | Q5                | p-trend |
| Men                    |                                     |                   |                   |                   |                   |         |
| All-cause mortality    |                                     |                   |                   |                   |                   |         |
| Model 1 <sup>a</sup>   | 1.00 (ref)                          | 0.81 (0.65, 1.01) | 0.82 (0.66, 1.03) | 0.70 (0.56, 0.88) | 0.61 (0.48, 0.77) | <0.001  |
| Model 2 <sup>b</sup>   | 1.00 (ref)                          | 0.83 (0.66, 1.04) | 0.86 (0.66, 1.07) | 0.73 (0.58, 0.93) | 0.64 (0.51, 0.81) | <0.001  |
| Cancer                 |                                     |                   |                   |                   |                   |         |
| Model 1 <sup>a</sup>   | 1.00 (ref)                          | 0.77 (0.57, 1.04) | 0.85 (0.64, 1.14) | 0.77 (0.57, 1.04) | 0.62 (0.46, 0.84) | 0.005   |
| Model 2 <sup>b</sup>   | 1.00 (ref)                          | 0.79 (0.59, 1.08) | 0.88 (0.65, 1.19) | 0.80 (0.59, 1.09) | 0.66 (0.48, 0.91) | 0.009   |
| Cardiovascular disease |                                     |                   |                   |                   |                   |         |
| Model 1 <sup>a</sup>   | 1.00 (ref)                          | 0.76 (0.41, 1.42) | 0.60 (0.30, 1.18) | 0.81 (0.44, 1.51) | 0.49 (0.25, 0.99) | 0.07    |
| Model 2 <sup>b</sup>   | 1.00 (ref)                          | 0.82 (0.43, 1.54) | 0.67 (0.34, 1.33) | 0.94 (0.49, 1.79) | 0.55 (0.27, 1.13) | 0.19    |
| Women                  |                                     |                   |                   |                   |                   |         |
| All-cause mortality    |                                     |                   |                   |                   |                   |         |
| Model 1 <sup>a</sup>   | 1.00 (ref)                          | 1.00 (0.74, 1.34) | 0.93 (0.70, 1.26) | 0.69 (0.50, 0.94) | 0.85 (0.63, 1.14) | 0.69    |
| Model 2 <sup>b</sup>   | 1.00 (ref)                          | 0.97 (0.72, 1.31) | 0.92 (0.68, 1.24) | 0.67 (0.48, 0.92) | 0.84 (0.63, 1.14) | 0.75    |
| Cancer                 |                                     |                   |                   |                   |                   |         |
| Model 1 <sup>a</sup>   | 1.00 (ref)                          | 1.17 (0.79, 1.72) | 1.07 (0.72, 1.59) | 0.85 (0.57, 1.29) | 0.96 (0.65, 1.43) | 0.70    |
| Model 2 <sup>b</sup>   | 1.00 (ref)                          | 1.14 (0.77, 1.70) | 1.05 (0.71, 1.57) | 0.84 (0.55, 1.27) | 0.94 (0.63, 1.41) | 0.72    |
| Cardiovascular disease |                                     |                   |                   |                   |                   |         |
| Model 1 <sup>a</sup>   | 1.00 (ref)                          | 1.15 (0.51, 2.57) | 1.17 (0.53, 2.58) | 0.78 (0.33, 1.84) | 0.93 (0.41, 2.09) | 0.77    |
| Model 2 <sup>b</sup>   | 1.00 (ref)                          | 1.13 (0.50, 2.55) | 1.16 (0.52, 2.60) | 0.76 (0.32, 1.83) | 0.94 (0.41, 2.14) | 0.80    |

The Cox proportional hazards model was used, and values were expressed as the hazard ratios (95% CI) in Models 1–2.

a Model 1 was adjusted for age, sex, and data collection site.

b In addition to the variables in Model 1, Model 2 was adjusted for BMI, smoking status, physical activity, alcohol consumption status, educational attainment, vitamin supplement intake, and total energy intake.
